# Supplementary material for: Epistatic interaction between KIR3DS1 and HLA-B delays the progression to AIDS
Source: Springer Nature journal article supplement (doi:10.1038/ng934), 2002-07-22
Supplement: 41588_2002_BFng934z_MOESM1_ESM.pdf [file 41588_2002_BFng934z_MOESM1_ESM.pdf]

**Table A. Synergistic effect of *KIR3DS1* and *HLA-B Bw4-801* on progression to AIDS-related endpoints**

| Genetic Variable         | AIDS Outcome | Blood Exposure |      | Sexual Exposure |     | MHCS     |      | MACS     |      | SFCC     |     | ALIVE    |       |     |      |      |     |      |      |
|--------------------------|--------------|----------------|------|-----------------|-----|----------|------|----------|------|----------|-----|----------|-------|-----|------|------|-----|------|------|
|                          |              | <i>n</i>       | RH   | <i>n</i>        | RH  | <i>n</i> | RH   | <i>n</i> | RH   | <i>n</i> | RH  | <i>n</i> | RH    |     |      |      |     |      |      |
| <i>KIR3DS1</i>           |              |                |      |                 |     |          |      |          |      |          |     |          |       |     |      |      |     |      |      |
|                          | CD4<200      | 425            | 1.38 | 0.02            | 479 | 1.14     | 0.37 | 209      | 1.32 | 0.07     | 358 | 1.38     | 0.03  | 121 | 0.56 | 0.06 | 216 | 2.32 | 0.06 |
|                          | AIDS 1993    | 428            | 1.33 | 0.05            | 479 | 1.13     | 0.36 | 212      | 1.32 | 0.07     | 358 | 1.27     | 0.10  | 121 | 0.73 | 0.25 | 216 | 1.93 | 0.13 |
|                          | AIDS 1987    | 436            | 1.00 | 1.00            | 481 | 1.20     | 0.24 | 217      | 1.06 | 0.79     | 360 | 1.36     | 0.07  | 121 | 0.76 | 0.38 | 219 | 0.61 | 0.52 |
|                          | Death        | 436            | 1.24 | 0.27            | 480 | 1.51     | 0.01 | 217      | 1.20 | 0.37     | 359 | 1.65     | 0.004 | 121 | 0.88 | 0.76 | 219 | 1.13 | 0.91 |
| <i>BW4-801</i>           |              |                |      |                 |     |          |      |          |      |          |     |          |       |     |      |      |     |      |      |
|                          | CD4<200      | 425            | 1.07 | 0.63            | 479 | 0.94     | 0.70 | 209      | 0.83 | 0.36     | 358 | 0.98     | 0.89  | 121 | 0.43 | 0.11 | 216 | 1.20 | 0.39 |
|                          | AIDS 1993    | 428            | 1.05 | 0.72            | 479 | 0.87     | 0.35 | 212      | 0.90 | 0.60     | 358 | 0.89     | 0.49  | 121 | 0.55 | 0.19 | 216 | 1.36 | 0.12 |
|                          | AIDS1987     | 436            | 1.00 | 1.00            | 481 | 0.84     | 0.33 | 217      | 1.05 | 0.85     | 360 | 0.79     | 0.25  | 121 | 0.95 | 0.91 | 219 | 0.28 | 0.37 |
|                          | Death        | 436            | 1.01 | 0.97            | 480 | 0.86     | 0.47 | 217      | 0.84 | 0.50     | 359 | 0.80     | 0.31  | 121 | 0.53 | 0.37 | 219 | 1.34 | 0.46 |
| <i>KIR3DS1 + Bw4-801</i> |              |                |      |                 |     |          |      |          |      |          |     |          |       |     |      |      |     |      |      |
|                          | CD4<200      | 425            | 0.73 | 0.22            | 479 | 0.65     | 0.07 | 209      | 0.97 | 0.92     | 358 | 0.65     | 0.11  | 121 | 1.32 | 0.62 | 216 | 0.13 | 0.02 |
|                          | AIDS 1993    | 428            | 0.55 | 0.02            | 479 | 0.71     | 0.11 | 212      | 0.61 | 0.09     | 358 | 0.70     | 0.14  | 121 | 0.93 | 0.89 | 216 | 0.24 | 0.05 |
|                          | AIDS 1987    | 436            | 0.78 | 0.44            | 481 | 0.79     | 0.33 | 217      | 0.68 | 0.33     | 360 | 0.83     | 0.52  | 121 | 0.72 | 0.53 | 219 | 1.25 | 0.81 |
|                          | Death        | 436            | 0.98 | 0.95            | 480 | 0.60     | 0.06 | 217      | 1.25 | 0.49     | 359 | 0.73     | 0.29  | 121 | 0.65 | 0.63 | 219 | 0.71 | 0.79 |
