# Supplementary material for: Epistatic interaction between KIR3DS1 and HLA-B delays the progression to AIDS
Source: Springer Nature journal article supplement (doi:10.1038/ng934), 2002-07-22
Supplement: 41588_2002_BFng934z_MOESM2_ESM.pdf [file 41588_2002_BFng934z_MOESM2_ESM.pdf]

**Table B. *KIR3DS1+HLA-B Bw4-80I* Interaction: Alternative Models.**

|             | Interaction<br>( <i>KIR X Bw4</i> ) | <i>KIR3DS1</i> | <i>Bw4 80I</i> | Model chi square |
|-------------|-------------------------------------|----------------|----------------|------------------|
| CD4<200     | Add. x Add.                         | Add.           | Add.           | 82.42            |
|             | Add. x Add.                         | Add.           | Dom.           | 82.15            |
|             | Dom. x Add.                         | Add.           | Add.           | 81.13            |
|             | Dom. x Add.                         | Add.           | Dom.           | 80.82            |
|             | Add. x Add.                         | Dom.           | Add.           | 80.55            |
|             | Add. x Dom.                         | Add.           | Dom.           | 80.42            |
|             | Add. x Add.                         | Dom.           | Dom.           | 80.37            |
|             | Add. x Dom.                         | Add.           | Add.           | 80.21            |
|             | Dom. x Add.                         | Dom.           | Add.           | 79.87            |
|             | Dom. x Add.                         | Dom.           | Dom.           | 79.64            |
|             | Dom. x Dom.                         | Add.           | Dom.           | 79.54            |
|             | Dom. x Dom.                         | Add.           | Add.           | 79.42            |
|             | Add. x Dom.                         | Dom.           | Dom.           | 78.62            |
|             | Add. x Dom.                         | Dom.           | Add.           | 78.50            |
| Dom. x Dom. | Dom.                                | Add.           | 78.15          |                  |
| AIDS 1993   | Add. x Add.                         | Add.           | Add.           | 96.29            |
|             | Add. x Add.                         | Add.           | Dom.           | 96.26            |
|             | Dom. x Add.                         | Add.           | Add.           | 94.63            |
|             | Dom. x Add.                         | Add.           | Dom.           | 94.57            |
|             | Add. x Add.                         | Dom.           | Add.           | 94.49            |
|             | Add. x Add.                         | Dom.           | Dom.           | 94.48            |
|             | Dom. x Add.                         | Dom.           | Add.           | 93.45            |
|             | Dom. x Add.                         | Dom.           | Dom.           | 93.42            |
|             | Add. x Dom.                         | Add.           | Dom.           | 93.38            |
|             | Add. x Dom.                         | Add.           | Add.           | 93.19            |
|             | Dom. x Dom.                         | Add.           | Dom.           | 92.19            |
|             | Dom. x Dom.                         | Add.           | Add.           | 92.06            |
|             | Add. x Dom.                         | Dom.           | Dom.           | 91.74            |
|             | Add. x Dom.                         | Dom.           | Add.           | 91.74            |
| Dom. x Dom. | Dom.                                | Dom.           | 91.04          |                  |
| Dom. x Dom. | Dom.                                | Add.           | 91.03          |                  |
| AIDS 1987   | Add. x Add.                         | Add.           | Add.           | 65.86            |
|             | Add. x Add.                         | Add.           | Dom.           | 65.63            |
|             | Add. x Add.                         | Dom.           | Add.           | 65.32            |
|             | Add. x Add.                         | Dom.           | Dom.           | 65.02            |
|             | Dom. x Add.                         | Add.           | Add.           | 64.97            |
|             | Add. x Dom.                         | Add.           | Add.           | 64.77            |
|             | Dom. x Add.                         | Add.           | Dom.           | 64.70            |
|             | Dom. x Add.                         | Dom.           | Add.           | 64.65            |
|             | Add. x Dom.                         | Dom.           | Add.           | 64.38            |
|             | Dom. x Add.                         | Dom.           | Dom.           | 64.32            |
|             | Add. x Dom.                         | Add.           | Dom.           | 64.18            |
|             | Dom. x Dom.                         | Add.           | Add.           | 64.05            |
|             | Dom. x Dom.                         | Dom.           | Add.           | 63.85            |
|             | Add. x Dom.                         | Dom.           | Dom.           | 63.72            |
| Dom. x Dom. | Add.                                | Dom.           | 63.40          |                  |
| Dom. x Dom. | Dom.                                | Dom.           | 63.14          |                  |
| Death       | Add. x Add.                         | Add.           | Dom.           | 54.71            |
|             | Add. x Add.                         | Add.           | Add.           | 54.39            |
|             | Dom. x Add.                         | Add.           | Dom.           | 54.31            |
|             | Dom. x Add.                         | Add.           | Add.           | 53.91            |
|             | Add. x Dom.                         | Add.           | Dom.           | 53.41            |
|             | Add. x Dom.                         | Add.           | Add.           | 53.36            |
|             | Dom. x Dom.                         | Add.           | Dom.           | 53.18            |
|             | Dom. x Dom.                         | Add.           | Add.           | 53.07            |
|             | Dom. x Add.                         | Dom.           | Dom.           | 51.38            |
|             | Add. x Add.                         | Dom.           | Dom.           | 51.26            |
|             | Dom. x Add.                         | Dom.           | Add.           | 50.95            |
|             | Add. x Add.                         | Dom.           | Add.           | 50.88            |
|             | Dom. x Dom.                         | Dom.           | Dom.           | 50.27            |
|             | Dom. x Dom.                         | Dom.           | Add.           | 50.14            |
| Add. x Dom. | Dom.                                | Dom.           | 50.11          |                  |
| Add. x Dom. | Dom.                                | Add.           | 50.01          |                  |
