# Supplementary material for: Epistatic interaction between KIR3DS1 and HLA-B delays the progression to AIDS
Source: Springer Nature journal article supplement (doi:10.1038/ng934), 2002-07-22
Supplement: 41588_2002_BFng934z_MOESM3_ESM.pdf [file 41588_2002_BFng934z_MOESM3_ESM.pdf]

# Web Fig. A

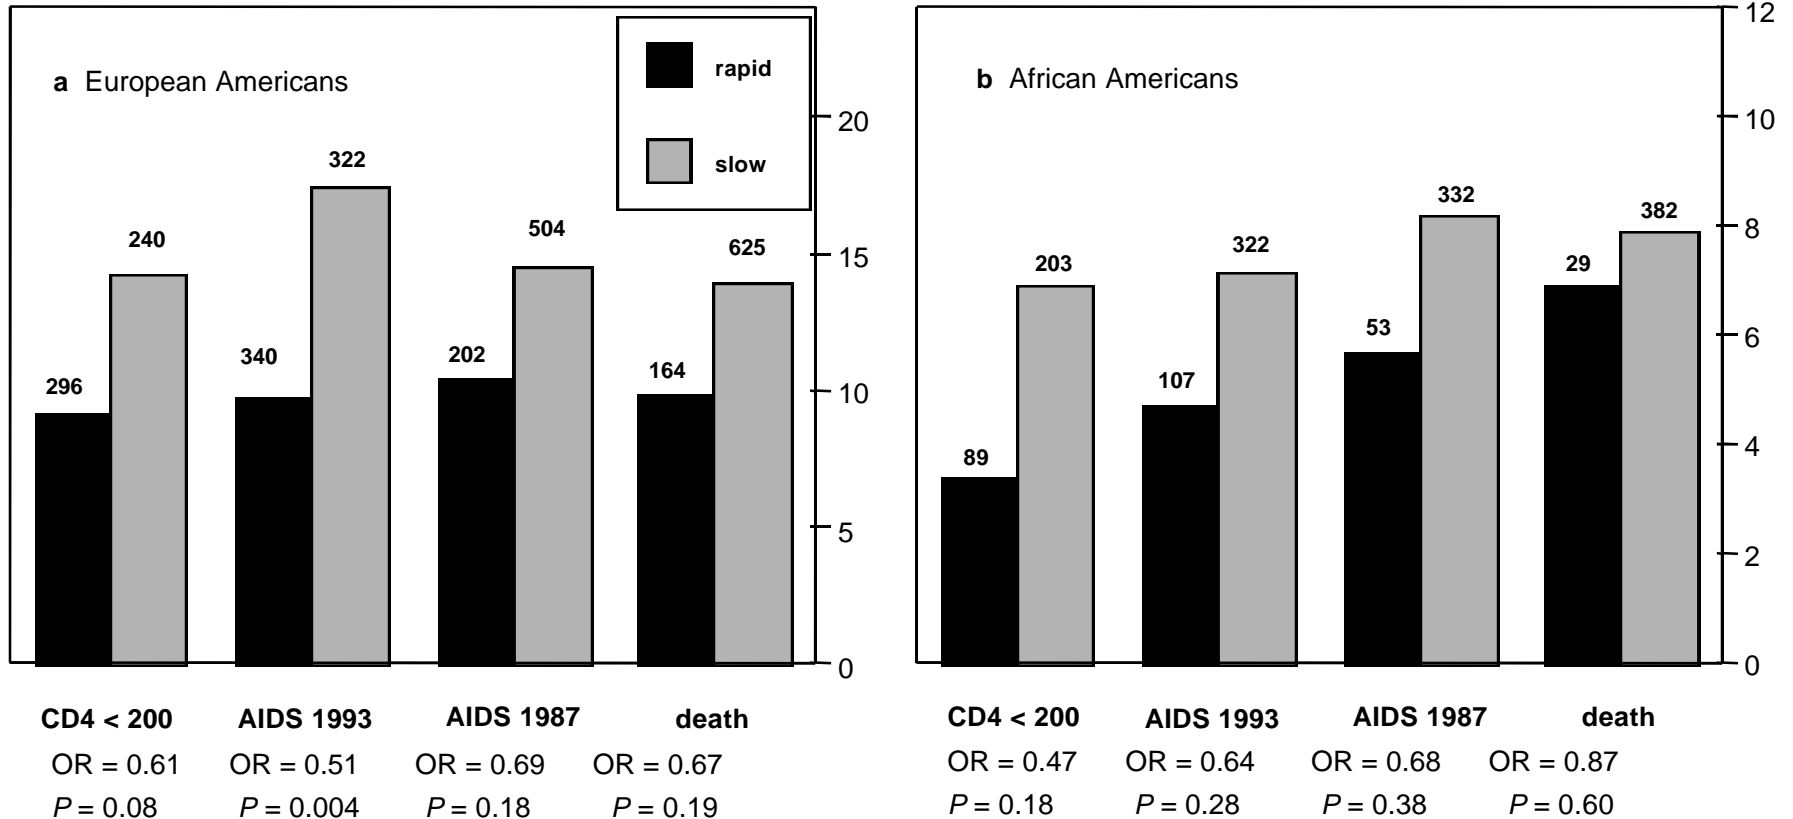

Figure A: Dichotomous disease category analysis comparing the frequency of genotypes with both *KIR3DS1* and *HLA-B Bw4-80I* in rapid and slow progressors to four AIDS outcomes. Subjects are European American (a) and African American (b) seroconverters and seroprevalents in combined cohorts, with only seroconverters included in the rapid groups but both seroconverters and seroprevalents included in the slow groups, as described in text Figure 1d. The cutoff times between rapid and slow progression are 10 years, for European Americans, and 7.5 years for African Americans. A shorter time is used for African Americans since, for our subjects, this group has a shorter follow up time. The number of subjects in each category is shown above the bars. Odds ratio (OR) and significance (P) by a two-sided Fisher's exact test are shown for each comparison.
